# Supplementary material for: Levels of persistent organic pollutants (POPs) in the Antarctic atmosphere over time (1980 to 2021) and estimation of their atmospheric half-lives
Source: Copernicus journal article supplement (doi:10.5194/acp-23-8103-2023), 2023-07-19
Supplement: Supplementary file 1 [file acp-23-8103-2023-supplement.pdf]

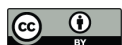

*Supplement of*

## **Levels of persistent organic pollutants (POPs) in the Antarctic atmosphere over time (1980 to 2021) and estimation of their atmospheric half-lives**

**Thais Luarte et al.**

*Correspondence to:* Thais Luarte ([thaisluarte@gmail.com](mailto:thaisluarte@gmail.com)) and Cristóbal J. Galbán-Malagón ([cristobal.galban@umayor.cl](mailto:cristobal.galban@umayor.cl))

The copyright of individual parts of the supplement might differ from the article licence.

Table S.1. Reported atmospheric levels for the OCPs isomers reviewed. HCB (Hexachlorobenzene),  $\alpha$ -HCH ( a isomer of hexachlorocyclohexane,  $\beta$ -hch (b isomer of hexachlorocyclohexane),  $\gamma$ -HCH ( $\gamma$  isomer of hexachlorocyclohexane), 4,4'-DDT (4,4' diclorodiphenyl trichloroethane), 2,4'-DDT (2,4' diclorodiphenyl trichloroethane), 4,4' DDE (4,4' Dichlorodiphenyl dichloroethylene), 2,4 (2,4 Dichlorodiphenyl dichloroethylene), 4,4' DDD (4,4' diclorodiphenyl dichloroethane), 2,4' (2,4'- diclorodiphenyl dichloroethane). ND: Not detected, NR: Not reported, BDL: Below detection limit, LOQ: Limit of quantification

| Year | HCB | $\alpha$ -HCH | $\beta$ -HCH | $\gamma$ -HCH | 4,4'-DDT | 2,4'-DDT | 4,4'-DDE | 2,4-DDE | 4,4'-DDD | 2,4'-DDD | Reference               |
|------|-----|---------------|--------------|---------------|----------|----------|----------|---------|----------|----------|-------------------------|
| 2005 | -   | ND            | ND           | ND            | ND       | ND       | ND       | ND      | 0.29     | ND       | Baek et al. 2011        |
| 2006 | -   | 2.5           | 0.12         | 1.03          | ND       | ND       | 0.4      | ND      | ND       | ND       | Baek et al. 2011        |
| 2006 | -   | 1.98          | ND           | 0.72          | ND       | ND       | ND       | ND      | ND       | ND       | Baek et al. 2011        |
| 2006 | -   | 2.36          | ND           | 0.7           | ND       | ND       | ND       | ND      | ND       | ND       | Baek et al. 2011        |
| 2007 | -   | 1.72          | ND           | ND            | ND       | ND       | ND       | ND      | ND       | ND       | Baek et al. 2011        |
| 1990 | NR  | 4.8           | -            | 5             | NA       | -        | NA       | -       | -        | -        | Bidleman et al. 1993    |
| 1990 | NR  | 4             | -            | 1.7           | 1.1      | -        | 0.64     | -       | -        | -        | Bidleman et al. 1993    |
| 1990 | NR  | 4.7           | -            | 6             | 0.089    | -        | 0.43     | -       | -        | -        | Bidleman et al. 1993    |
| 1990 | 40  | 3.3           | -            | 1.4           | 0.38     | -        | 0.17     | -       | -        | -        | Bidleman et al. 1993    |
| 1990 | 78  | 3.3           | -            | 1.1           | <0.2     | -        | 0.25     | -       | -        | -        | Bidleman et al. 1993    |
| 1990 | NR  | 2.7           | -            | 1.6           | NA       | -        | NA       | -       | -        | -        | Bidleman et al. 1993    |
| 1990 | 70  | 3.6           | -            | 5.6           | 0.35     | -        | 0.17     | -       | -        | -        | Bidleman et al. 1993    |
| 1990 | NR  | 4.4           | -            | 16.9          | 0.58     | -        | 0.51     | -       | -        | -        | Bidleman et al. 1993    |
| 1990 | NR  | 6.7           | -            | 13            | 0.72     | -        | 0.54     | -       | -        | -        | Bidleman et al. 1993    |
| 2014 | -   | <0.13         | <0.065       | 2.23          | ND       | <0.91    | <0.15    | ND      | ND       | <0.72    | Bigot et al., 2016      |
| 2014 | -   | <0.23         | <0.032       | 2.8           | <0.61    | <0.91    | 0.44     | <0.099  | <0.49    | <0.39    | Bigot et al., 2016      |
| 2014 | -   | <0.33         | <0.059       | 3.15          | ND       | <2.73    | 0.15     | <0.15   | <0.38    | <0.41    | Bigot et al., 2016      |
| 2014 | -   | <0.80         | <0.37        | 4.34          | <7.79    | <0.99    | <0.78    | <0.51   | <1.77    | <1.62    | Bigot et al., 2016      |
| 2014 | -   | 0.93*         | <0.76        | 2.48          | <5.30    | ND       | <0.15    | <0.15   | <0.67    | <0.62    | Bigot et al., 2016      |
| 2014 | -   | <0.31         | <0.030       | 3.36          | NR       | NR       | <0.15    | ND      | NR       | <0.60    | Bigot et al., 2016      |
| 2014 | -   | NR            | NR           | NR            | NR       | NR       | NR       | NR      | NR       | NR       | Bigot et al., 2016      |
| 2014 | -   | <0.15         | <0.079       | <0.70         | <0.67    | <1.04    | nd       | <0.15   | nd       | <0.39    | Bigot et al., 2016      |
| 2014 | -   | <0.44         | <0.23        | 2.88*         | <3.44    | nd       | <0.15    | <0.30   | <0.54    | <1.22    | Bigot et al., 2016      |
| 2014 | -   | <1.11         | <0.69        | 1.93          | ND       | ND       | ND       | ND      | ND       | <0.39    | Bigot et al., 2016      |
| 2014 | -   | <0.30         | <0.10        | 2.35          | ND       | ND       | ND       | ND      | ND       | ND       | Bigot et al., 2016      |
| 2003 | -   | 0.21          | -            | -             | -        | -        | -        | -       | -        | -        | Cincinelli et al., 2009 |
| 2003 | -   | 0.35          | -            | -             | -        | -        | -        | -       | -        | -        | Cincinelli et al., 2009 |
| 2003 | -   | 0.25          | -            | -             | -        | -        | -        | -       | -        | -        | Cincinelli et al., 2009 |
| 2003 | -   | 0.17          | -            | -             | -        | -        | -        | -       | -        | -        | Cincinelli et al., 2009 |
| 2003 | -   | 0.17          | -            | -             | -        | -        | -        | -       | -        | -        | Cincinelli et al., 2009 |
| 2004 | -   | 0.25          | -            | -             | -        | -        | -        | -       | -        | -        | Cincinelli et al., 2009 |
| 2004 | -   | 0.19          | -            | -             | -        | -        | -        | -       | -        | -        | Cincinelli et al., 2009 |
| 2004 | -   | 0.1           | -            | -             | -        | -        | -        | -       | -        | -        | Cincinelli et al., 2009 |



|      |      |      |   |      |   |   |   |   |   |   |                             |
|------|------|------|---|------|---|---|---|---|---|---|-----------------------------|
| 2002 |      | 0.32 | - | 0.34 | - | - | - | - | - | - | Dickhut et al. 2005         |
| 2008 | 9.33 | 0.87 | - | 3.89 | - | - | - | - | - | - | Galban-Malagon et al., 2013 |

Continue

|           |       |      |      |      |                   |                   |                   |       |       |       |                             |
|-----------|-------|------|------|------|-------------------|-------------------|-------------------|-------|-------|-------|-----------------------------|
| 2008      | 13.54 | 5.84 | -    | 5.11 | -                 | -                 | -                 | -     | -     | -     | Galban-Malagon et al., 2013 |
| 2008      | 2.18  | 0.06 | -    | 3.93 | -                 | -                 | -                 | -     | -     | -     | Galban-Malagon et al., 2013 |
| 2008      | 3.28  | 0.18 | -    | 5.84 | -                 | -                 | -                 | -     | -     | -     | Galban-Malagon et al., 2013 |
| 2008      | 5.01  | 1.2  | -    | 7.1  | -                 | -                 | -                 | -     | -     | -     | Galban-Malagon et al., 2013 |
| 2008      | 15.82 | 2.09 | -    | 1.47 | -                 | -                 | -                 | -     | -     | -     | Galban-Malagon et al., 2013 |
| 2009      | 2.35  | 0.31 | -    | 0.54 | -                 | -                 | -                 | -     | -     | -     | Galban-Malagon et al., 2013 |
| 2009      | 30.13 | 0.14 | -    | 1.87 | -                 | -                 | -                 | -     | -     | -     | Galban-Malagon et al., 2013 |
| 2009      | 25.98 | 0.05 | -    | 0.11 | -                 | -                 | -                 | -     | -     | -     | Galban-Malagon et al., 2013 |
| 2009      | 3.31  | 0.04 | -    | 0.2  | -                 | -                 | -                 | -     | -     | -     | Galban-Malagon et al., 2013 |
| 2009      | 34.24 | 0.23 | -    | 0.25 | -                 | -                 | -                 | -     | -     | -     | Galban-Malagon et al., 2013 |
| 2009      | 12.62 | 0.46 | -    | 3    | -                 | -                 | -                 | -     | -     | -     | Galban-Malagon et al., 2013 |
| 2009      | 51.82 | 0.22 | -    | 0.19 | -                 | -                 | -                 | -     | -     | -     | Galban-Malagon et al., 2013 |
| 2009      | 27.31 | 0.16 | -    | 0.07 | -                 | -                 | -                 | -     | -     | -     | Galban-Malagon et al., 2013 |
| 2009      | 49.71 | 0.1  | -    | 0.16 | -                 | -                 | -                 | -     | -     | -     | Galban-Malagon et al., 2013 |
| 2010-2011 | 179   | 5    | 1.5  | 2.7  | 0.8               | 0.2               | 1.5               | 0.4   | 0.9   | 0.3   | Hao et al. 2019             |
| 2011-2012 | 167   | 1.9  | 0.9  | 0.5  | 0.2               | 0.09              | 0.3               | 0.14  | 0.16  | 0.06  | Hao et al. 2019             |
| 2012-2013 | 190   | 2.2  | 1.2  | 1.2  | 0.2               | 0.2               | 0.6               | 0.19  | 0.17  | 0.1   | Hao et al. 2019             |
| 2013-2014 | 222   | 2.5  | 0.9  | 1    | 0.2               | 0.2               | 1                 | 0.5   | 0.14  | 0.1   | Hao et al. 2019             |
| 2014-2015 | 167   | 1.1  | 0.3  | 0.2  | 0.15              | 0.07              | 0.6               | 0.12  | 0.05  | 0.07  | Hao et al. 2019             |
| 2015-2017 | 129   | 1    | 0.12 | 0.2  | 0.07              | 0.04              | 0.2               | 0.04  | 0.03  | 0.039 | Hao et al. 2019             |
| 2017-2018 | 148   | 0.8  | 0.1  | 0.13 | 0.1               | 0.04              | 0.17              | 0.04  | 0.05  | 0.3   | Hao et al. 2019             |
| 1994      | -     | 2.1  | -    |      | 0.48 <sup>x</sup> |                   | 0.28 <sup>x</sup> | <0.03 | <0.01 | <0.03 | Kallenborn et al., 1998     |
| 1994      | -     | 1.6  | -    |      | 0.41 <sup>x</sup> | 0.19 <sup>x</sup> | 0.21 <sup>x</sup> | <0.03 | <0.01 | <0.03 | Kallenborn et al., 1998     |

|      |   |     |   |  |                   |                   |      |       |       |                   |                         |
|------|---|-----|---|--|-------------------|-------------------|------|-------|-------|-------------------|-------------------------|
| 1994 | - | 2.1 | - |  | <0.08             | 0.17 <sup>x</sup> | 0.56 | <0.03 | <0.01 | <0.03             | Kallenborn et al., 1998 |
| 1994 | - | 2.3 | - |  | 0.52 <sup>x</sup> | 0.13 <sup>x</sup> | 2.6  | <0.03 | 0.38  | 0.09 <sup>x</sup> | Kallenborn et al., 1998 |

Continue

|      |      |       |   |      |                   |                   |                   |                   |                   |                   |                         |
|------|------|-------|---|------|-------------------|-------------------|-------------------|-------------------|-------------------|-------------------|-------------------------|
| 1994 | -    | 1.6   | - |      | 0.12 <sup>x</sup> | 0.17 <sup>x</sup> | <0.2              | <0.03             | 0.05 <sup>x</sup> | <0.03             | Kallenborn et al., 1998 |
| 1994 | -    | 0.7   | - |      | 0.24 <sup>x</sup> | 0.06 <sup>x</sup> | <0.2              | <0.03             | 0.06 <sup>x</sup> | 0.04 <sup>x</sup> | Kallenborn et al., 1998 |
| 1994 | -    | 2     | - |      | 0.12 <sup>x</sup> | 0.09 <sup>x</sup> | <0.2              | <0.03             | 0.05 <sup>x</sup> | <0.03             | Kallenborn et al., 1998 |
| 1995 | -    | 1.6   | - |      | <0.08             | 0.06 <sup>x</sup> | <0.2              | <0.03             | <0.01             | <0.03             | Kallenborn et al., 1998 |
| 1995 | -    | 4.6   | - |      | 1.1               | 0.07 <sup>x</sup> | 0.39 <sup>x</sup> | 0.04 <sup>x</sup> | 0.10 <sup>x</sup> | <0.03             | Kallenborn et al., 1998 |
| 1995 | -    | <0.9  | - |      | 0.38 <sup>x</sup> | 0.34 <sup>x</sup> | <0.2              | 0.9               | 0.57              | 0.73              | Kallenborn et al., 1998 |
| 1995 | -    | 4.2   | - |      | 0.48 <sup>x</sup> | 0.49              | 0.29 <sup>x</sup> | <0.03             | <0.01             | 0.05 <sup>x</sup> | Kallenborn et al., 1998 |
| 1995 | -    | 3.7   | - |      | 0.43 <sup>x</sup> | 0.27 <sup>x</sup> | 0.28 <sup>x</sup> | 0.04 <sup>x</sup> | <0.01             | <0.03             | Kallenborn et al., 1998 |
| 1995 | -    | 4.6   | - |      | 0.42 <sup>x</sup> | 0.21 <sup>x</sup> | 0.39 <sup>x</sup> | <0.03             | <0.01             | <0.03             | Kallenborn et al., 1998 |
| 1995 | -    | 5.2   | - |      | <0.08             | 0.25 <sup>x</sup> | 0.40 <sup>x</sup> | <0.03             | <0.01             | 0.05 <sup>x</sup> | Kallenborn et al., 1998 |
| 1995 | -    | <0.9  | - |      | <0.08             | <0.01             | 0.85              | <0.03             | 0.57              | <0.03             | Kallenborn et al., 1998 |
| 1995 | -    | 8.4   | - |      | <0.08             | 0.49              | <0.2              | <0.03             | 0.06 <sup>x</sup> | <0.03             | Kallenborn et al., 1998 |
| 1995 | -    | <0.93 | - |      | <0.08             | 0.14 <sup>x</sup> | <0.2              | 0.02 <sup>x</sup> | <0.01             | <0.03             | Kallenborn et al., 1998 |
| 1995 | -    | 3     | - |      | 0.18 <sup>x</sup> | 0.78              | 0.23 <sup>x</sup> | 0.04 <sup>x</sup> | <0.01             | <0.03             | Kallenborn et al., 1998 |
| 1995 | -    | 2.5   | - |      | 0.30 <sup>x</sup> | 0.13 <sup>x</sup> | 0.20 <sup>x</sup> | <0.03             | 0.05 <sup>x</sup> | <0.03             | Kallenborn et al., 1998 |
| 1995 | -    | 2.7   | - |      | 0.25 <sup>x</sup> | 0.14 <sup>x</sup> | 0.24 <sup>x</sup> | 0.04 <sup>x</sup> | 0.06 <sup>x</sup> | <0.03             | Kallenborn et al., 1998 |
| 1995 | -    | 2.7   | - |      | <0.08             | <0.01             | <0.2              | 0.03 <sup>x</sup> | <0.01             | <0.03             | Kallenborn et al., 1998 |
| 2007 | 19.9 | 0.25  | - | 0.2  | 0.15              | 0.07 <sup>x</sup> | 0.2               | -                 | 0.04              | 0.01              | Kallenborn et al., 2013 |
| 2007 | 24   | 0.21  | - | <LOQ | <LOQ              | 0.07              | 0.42              | -                 | 0.2               | 0.05              | Kallenborn et al., 2013 |
| 2007 | 23.9 | 0.2   | - | <LOQ | <LOQ              | 0.16              | 0.03              | -                 | <LOQ              | <LOQ              | Kallenborn et al., 2013 |

|      |      |      |   |      |      |      |      |   |      |      |                         |
|------|------|------|---|------|------|------|------|---|------|------|-------------------------|
| 2007 | 20.1 | 0.2  | - | <LOQ | <LOQ | <LOQ | 0.09 | - | <LOQ | <LOQ | Kallenborn et al., 2013 |
| 2007 | 21.6 | 0.27 | - | <LOQ | 0.05 | <LOQ | 0.17 | - | 0.03 | <LOQ | Kallenborn et al., 2013 |

Continue

|      |      |      |   |      |      |      |      |   |      |      |                         |
|------|------|------|---|------|------|------|------|---|------|------|-------------------------|
| 2007 | 17.4 | 0.35 | - | 0.1  | 0.03 | <LOQ | 0.09 | - | 0.03 | <LOQ | Kallenborn et al., 2013 |
| 2007 | 20   | 0.22 | - | <LOQ | <LOQ | <LOQ | 0.05 | - | <LOQ | <LOQ | Kallenborn et al., 2013 |
| 2007 | 25.5 | 0.3  | - | <LOQ | <LOQ | <LOQ | 0.04 | - | <LOQ | <LOQ | Kallenborn et al., 2013 |
| 2007 | 26.1 | 0.3  | - | 0.1  | 0.03 | <LOQ | 0.05 | - | 0.02 | <LOQ | Kallenborn et al., 2013 |
| 2007 | 25.2 | 0.2  | - | <LOQ | 0.03 | <LOQ | 0.03 | - | <LOQ | <LOQ | Kallenborn et al., 2013 |
| 2007 | 21.2 | 0.31 | - | 0.09 | 0.03 | <LOQ | 0.04 | - | <LOQ | <LOQ | Kallenborn et al., 2013 |
| 2007 | 23.6 | 0.19 | - | <LOQ | 0.04 | <LOQ | 0.13 | - | 0.03 | <LOQ | Kallenborn et al., 2013 |
| 2007 | 18.9 | 0.34 | - | 0.12 | 0.04 | <LOQ | 0.1  | - | <LOQ | <LOQ | Kallenborn et al., 2013 |
| 2007 | 19   | 0.27 | - | 0.09 | 0.03 | 0.03 | 0.1  | - | 0.02 | <LOQ | Kallenborn et al., 2013 |
| 2007 | 23.7 | 0.25 | - | 0.1  | 0.09 | 0.03 | 0.09 | - | 0.03 | <LOQ | Kallenborn et al., 2013 |
| 2007 | 21.7 | 0.28 | - | 0.15 | 0.03 | 0.03 | 0.08 | - | <LOQ | <LOQ | Kallenborn et al., 2013 |
| 2007 | 20.4 | 0.23 | - | 0.1  | 0.03 | 0.03 | 0.1  | - | 0.02 | <LOQ | Kallenborn et al., 2013 |
| 2007 | 24.2 | 0.24 | - | 0.11 | 0.12 | 0.03 | 0.18 | - | 0.04 | <LOQ | Kallenborn et al., 2013 |
| 2007 | 25.1 | 0.2  | - | <LOQ | 0.1  | 0.05 | 0.55 | - | 0.07 | <LOQ | Kallenborn et al., 2013 |
| 2007 | 24.4 | 0.2  | - | <LOQ | 0.11 | 0.04 | 0.1  | - | 0.02 | <LOQ | Kallenborn et al., 2013 |
| 2007 | 29.2 | 0.22 | - | <LOQ | 0.16 | 0.03 | 0.16 | - | 0.03 | <LOQ | Kallenborn et al., 2013 |
| 2007 | 24.1 | 0.23 | - | 0.09 | 0.04 | 0.04 | 0.11 | - | 0.02 | <LOQ | Kallenborn et al., 2013 |
| 2007 | 28.6 | 0.5  | - | 0.23 | 0.05 | 0.03 | 0.08 | - | 0.02 | <LOQ | Kallenborn et al., 2013 |

|      |      |      |   |      |      |      |      |   |      |      |                         |
|------|------|------|---|------|------|------|------|---|------|------|-------------------------|
| 2007 | 26.5 | 0.18 | - | <LOQ | 0.05 | 0.06 | 0.07 | - | 0.02 | <LOQ | Kallenborn et al., 2013 |
| 2007 | 24.6 | 0.3  | - | 0.12 | 0.03 | <LOQ | 0.07 | - | 0.07 | 0.04 | Kallenborn et al., 2013 |
| 2007 | <LOQ | 0.76 | - | 0.27 | 0.05 | 0.07 | 0.24 | - | 0.06 | 0.03 | Kallenborn et al., 2013 |

Continue

|      |      |      |   |      |      |      |      |   |      |      |                         |
|------|------|------|---|------|------|------|------|---|------|------|-------------------------|
| 2007 | 24.4 | 0.27 | - | 0.09 | 0.04 | 0.09 | 0.1  | - | 0.02 | 0.02 | Kallenborn et al., 2013 |
| 2007 | 23.9 | 0.34 | - | 0.14 | 0.03 | 0.03 | 0.09 | - | 0.03 | <LOQ | Kallenborn et al., 2013 |
| 2007 | 27.6 | 0.25 | - | <LOQ | 0.03 | <LOQ | 0.04 | - | 0.02 | 0.02 | Kallenborn et al., 2013 |
| 2007 | 27.7 | 0.2  | - | <LOQ | 0.03 | <LOQ | 0.14 | - | 0.03 | <LOQ | Kallenborn et al., 2013 |
| 2007 | 30.2 | 0.22 | - | <LOQ | 0.03 | <LOQ | 0.14 | - | 0.02 | <LOQ | Kallenborn et al., 2013 |
| 2007 | 30.4 | 0.29 | - | <LOQ | <LOQ | <LOQ | 0.12 | - | 0.03 | <LOQ | Kallenborn et al., 2013 |
| 2007 | 29.4 | 0.34 | - | <LOQ | <LOQ | <LOQ | 0.03 | - | <LOQ | <LOQ | Kallenborn et al., 2013 |
| 2007 | 22   | 0.36 | - | 0.1  | <LOQ | <LOQ | 0.06 | - | <LOQ | <LOQ | Kallenborn et al., 2013 |
| 2007 | 25.1 | 0.29 | - | <LOQ | <LOQ | <LOQ | 0.04 | - | <LOQ | <LOQ | Kallenborn et al., 2013 |
| 2007 | 12.3 | 0.26 | - | <LOQ | <LOQ | <LOQ | 0.04 | - | <LOQ | <LOQ | Kallenborn et al., 2013 |
| 2007 | 16.7 | 0.24 | - | 0.1  | <LOQ | <LOQ | 0.04 | - | <LOQ | <LOQ | Kallenborn et al., 2013 |
| 2007 | 9.87 | 0.3  | - | 0.13 | 0.09 | <LOQ | 0.1  | - | <LOQ | <LOQ | Kallenborn et al., 2013 |
| 2007 | 14.6 | 0.21 | - | <LOQ | <LOQ | 0.07 | 0.03 | - | <LOQ | <LOQ | Kallenborn et al., 2013 |
| 2007 | 18.7 | 0.24 | - | 0.1  | <LOQ | <LOQ | 0.03 | - | <LOQ | <LOQ | Kallenborn et al., 2013 |
| 2007 | 16.5 | 0.17 | - | <LOQ | <LOQ | <LOQ | 0.02 | - | <LOQ | <LOQ | Kallenborn et al., 2013 |
| 2008 | 15.6 | 0.18 | - | <LOQ | <LOQ | <LOQ | 0.02 | - | <LOQ | <LOQ | Kallenborn et al., 2013 |
| 2008 | 13.2 | 0.18 | - | <LOQ | <LOQ | <LOQ | 0.02 | - | <LOQ | <LOQ | Kallenborn et al., 2013 |
| 2008 | 16.5 | 0.17 | - | <LOQ | <LOQ | <LOQ | 0.02 | - | <LOQ | <LOQ | Kallenborn et al., 2013 |

|      |      |      |   |      |      |      |      |   |      |      |                         |
|------|------|------|---|------|------|------|------|---|------|------|-------------------------|
| 2008 | 11.6 | 0.18 | - | <LOQ | 0.04 | <LOQ | 0.03 | - | 0.02 | <LOQ | Kallenborn et al., 2013 |
| 2008 | 17   | 0.17 | - | <LOQ | <LOQ | 0.03 | 0.03 | - | <LOQ | <LOQ | Kallenborn et al., 2013 |
| 2008 | 14.8 | 0.15 | - | <LOQ | <LOQ | <LOQ | 0.02 | - | <LOQ | <LOQ | Kallenborn et al., 2013 |

Continue

|      |      |      |   |      |      |      |      |   |      |      |                         |
|------|------|------|---|------|------|------|------|---|------|------|-------------------------|
| 2008 | 20.2 | 0.16 | - | <LOQ | <LOQ | <LOQ | <LOQ | - | <LOQ | <LOQ | Kallenborn et al., 2013 |
| 2008 | 13.8 | 0.15 | - | <LOQ | <LOQ | <LOQ | <LOQ | - | <LOQ | <LOQ | Kallenborn et al., 2013 |
| 2008 | 16   | 0.16 | - | <LOQ | <LOQ | <LOQ | 0.02 | - | <LOQ | <LOQ | Kallenborn et al., 2013 |
| 2008 | 16.4 | 0.2  | - | <LOQ | <LOQ | <LOQ | 0.02 | - | <LOQ | <LOQ | Kallenborn et al., 2013 |
| 2008 | 19.1 | 0.18 | - | <LOQ | <LOQ | <LOQ | 0.02 | - | <LOQ | <LOQ | Kallenborn et al., 2013 |
| 2008 | 17.7 | 0.21 | - | <LOQ | <LOQ | <LOQ | 0.02 | - | <LOQ | <LOQ | Kallenborn et al., 2013 |
| 2008 | 20.5 | 0.2  | - | <LOQ | <LOQ | <LOQ | 0.02 | - | <LOQ | <LOQ | Kallenborn et al., 2013 |
| 2008 | 19.5 | 0.2  | - | 0.1  | <LOQ | <LOQ | <LOQ | - | <LOQ | <LOQ | Kallenborn et al., 2013 |
| 2008 | 18.9 | 0.37 | - | <LOQ | <LOQ | <LOQ | <LOQ | - | <LOQ | <LOQ | Kallenborn et al., 2013 |
| 2008 | 18.7 | 0.44 | - | 0.1  | <LOQ | <LOQ | 0.03 | - | <LOQ | <LOQ | Kallenborn et al., 2013 |
| 2008 | 18.5 | 0.25 | - | <LOQ | <LOQ | <LOQ | 0.02 | - | <LOQ | <LOQ | Kallenborn et al., 2013 |
| 2008 | 19.5 | 0.22 | - | <LOQ | <LOQ | <LOQ | 0.02 | - | <LOQ | <LOQ | Kallenborn et al., 2013 |
| 2008 | 22.1 | 0.27 | - | 0.11 | <LOQ | <LOQ | 0.06 | - | <LOQ | <LOQ | Kallenborn et al., 2013 |
| 2008 | 25.3 | 0.19 | - | <LOQ | <LOQ | <LOQ | <LOQ | - | <LOQ | <LOQ | Kallenborn et al., 2013 |
| 2008 | 15.9 | 0.24 | - | <LOQ | <LOQ | <LOQ | 0.02 | - | <LOQ | <LOQ | Kallenborn et al., 2013 |
| 2008 | 18.7 | 0.21 | - | <LOQ | <LOQ | <LOQ | 0.02 | - | <LOQ | <LOQ | Kallenborn et al., 2013 |
| 2008 | 28.7 | 0.21 | - | <LOQ | <LOQ | <LOQ | <LOQ | - | <LOQ | <LOQ | Kallenborn et al., 2013 |
| 2008 | 27.5 | 0.41 | - | 0.1  | <LOQ | <LOQ | <LOQ | - | <LOQ | <LOQ | Kallenborn et al., 2013 |



|      |      |      |   |      |      |      |      |   |      |      |                         |
|------|------|------|---|------|------|------|------|---|------|------|-------------------------|
| 2008 | 23.7 | 0.17 | - | <LOQ | <LOQ | <LOQ | <LOQ | - | <LOQ | <LOQ | Kallenborn et al., 2013 |
| 2008 | 23.7 | 0.25 | - | <LOQ | <LOQ | <LOQ | 0.03 | - | <LOQ | <LOQ | Kallenborn et al., 2013 |
| 2008 | 20.5 | 0.18 | - | <LOQ | <LOQ | <LOQ | 0.09 | - | <LOQ | <LOQ | Kallenborn et al., 2013 |

Continue

|      |      |      |   |      |      |      |      |   |      |      |                         |
|------|------|------|---|------|------|------|------|---|------|------|-------------------------|
| 2008 | 24.3 | 0.25 | - | 0.1  | <LOQ | 0.03 | 0.04 | - | <LOQ | <LOQ | Kallenborn et al., 2013 |
| 2008 | 26.5 | 0.13 | - | <LOQ | <LOQ | <LOQ | <LOQ | - | <LOQ | <LOQ | Kallenborn et al., 2013 |
| 2008 | 22.7 | 0.19 | - | 0.1  | <LOQ | <LOQ | 0.03 | - | <LOQ | <LOQ | Kallenborn et al., 2013 |
| 2008 | 25.7 | 0.2  | - | <LOQ | <LOQ | <LOQ | 0.03 | - | <LOQ | <LOQ | Kallenborn et al., 2013 |
| 2008 | 22.3 | 0.19 | - | <LOQ | <LOQ | <LOQ | 0.05 | - | <LOQ | <LOQ | Kallenborn et al., 2013 |
| 2008 | 24.8 | 0.2  | - | <LOQ | <LOQ | <LOQ | 0.05 | - | <LOQ | <LOQ | Kallenborn et al., 2013 |
| 2008 | 26.4 | 0.25 | - | 0.22 | <LOQ | <LOQ | 0.06 | - | <LOQ | <LOQ | Kallenborn et al., 2013 |
| 2008 | 25.3 | 0.12 | - | <LOQ | <LOQ | <LOQ | <LOQ | - | <LOQ | <LOQ | Kallenborn et al., 2013 |
| 2008 | 26.7 | 0.14 | - | <LOQ | <LOQ | <LOQ | 0.02 | - | <LOQ | <LOQ | Kallenborn et al., 2013 |
| 2008 | 25.2 | 0.28 | - | <LOQ | <LOQ | <LOQ | 0.03 | - | <LOQ | <LOQ | Kallenborn et al., 2013 |
| 2008 | 24.7 | 0.25 | - |      | <LOQ | <LOQ | 0.04 | - | <LOQ | <LOQ | Kallenborn et al., 2013 |
| 2008 | 27.3 | 0.16 | - | <LOQ | <LOQ | <LOQ | 0.02 | - | <LOQ | <LOQ | Kallenborn et al., 2013 |
| 2008 | 22.6 | 0.27 | - | 0.1  | <LOQ | <LOQ | 0.08 | - | <LOQ | <LOQ | Kallenborn et al., 2013 |
| 2008 | 25.9 | 0.17 | - | <LOQ | <LOQ | 0.03 | 0.04 | - | <LOQ | <LOQ | Kallenborn et al., 2013 |
| 2008 | 26.2 | 0.19 | - | <LOQ | <LOQ | <LOQ | <LOQ | - | <LOQ | <LOQ | Kallenborn et al., 2013 |
| 2008 | 28.1 | 0.34 | - | 0.1  | <LOQ | <LOQ | 0.04 | - | <LOQ | <LOQ | Kallenborn et al., 2013 |
| 2008 | 25.7 | 0.24 | - | <LOQ | <LOQ | <LOQ | <LOQ | - | <LOQ | <LOQ | Kallenborn et al., 2013 |
| 2008 | 21   | 0.29 | - | 0.1  | <LOQ | <LOQ | 0.04 | - | <LOQ | <LOQ | Kallenborn et al., 2013 |
| 2008 | 26.7 | 0.43 | - | 0.11 | <LOQ | <LOQ | <LOQ | - | <LOQ | <LOQ | Kallenborn et al., 2013 |

|      |      |      |   |      |      |      |      |   |      |      |                         |
|------|------|------|---|------|------|------|------|---|------|------|-------------------------|
| 2008 | 27.2 | 0.2  | - | <LOQ | <LOQ | <LOQ | 0.02 | - | <LOQ | <LOQ | Kallenborn et al., 2013 |
| 2008 | 19.1 | 0.46 | - | 0.12 | <LOQ | <LOQ | <LOQ | - | <LOQ | <LOQ | Kallenborn et al., 2013 |
| 2008 | 18.9 | 0.2  | - | <LOQ | <LOQ | 0.06 | 0.05 | - | <LOQ | <LOQ | Kallenborn et al., 2013 |
| 2008 | 22.1 | 0.16 | - | <LOQ | <LOQ | <LOQ | 0.04 | - | <LOQ | <LOQ | Kallenborn et al., 2013 |

Continue

|      |      |      |   |      |      |      |      |   |      |      |                         |
|------|------|------|---|------|------|------|------|---|------|------|-------------------------|
| 2008 | 21.4 | 0.15 | - | <LOQ | <LOQ | <LOQ | 0.04 | - | <LOQ | <LOQ | Kallenborn et al., 2013 |
| 2008 | 16.1 | 0.15 | - | <LOQ | <LOQ | <LOQ | 0.02 | - | <LOQ | <LOQ | Kallenborn et al., 2013 |
| 2008 | 28.3 | 0.13 | - | <LOQ | <LOQ | <LOQ | 0.02 | - | <LOQ | <LOQ | Kallenborn et al., 2013 |
| 2008 | 12.4 | 0.14 | - | <LOQ | <LOQ | <LOQ | <LOQ | - | <LOQ | <LOQ | Kallenborn et al., 2013 |
| 2008 | 14.8 | 0.15 | - | <LOQ | <LOQ | <LOQ | 0.03 | - | <LOQ | <LOQ | Kallenborn et al., 2013 |
| 2008 | 14.2 | 0.18 | - | <LOQ | <LOQ | <LOQ | <LOQ | - | <LOQ | <LOQ | Kallenborn et al., 2013 |
| 2008 | 12.2 | 0.17 | - | <LOQ | <LOQ | <LOQ | <LOQ | - | <LOQ | <LOQ | Kallenborn et al., 2013 |
| 2008 | 15.9 | 0.16 | - | <LOQ | <LOQ | <LOQ | <LOQ | - | <LOQ | <LOQ | Kallenborn et al., 2013 |
| 2008 | 13.2 | 0.15 | - | <LOQ | <LOQ | <LOQ | 0.02 | - | <LOQ | <LOQ | Kallenborn et al., 2013 |
| 2008 | 12.4 | 0.16 | - | <LOQ | <LOQ | <LOQ | <LOQ | - | <LOQ | <LOQ | Kallenborn et al., 2013 |
| 2008 | 14.9 | 0.18 | - | <LOQ | <LOQ | <LOQ | 0.03 | - | <LOQ | <LOQ | Kallenborn et al., 2013 |
| 2008 | 16.4 | 0.2  | - | <LOQ | <LOQ | <LOQ | 0.02 | - | <LOQ | <LOQ | Kallenborn et al., 2013 |
| 2008 | 21.1 | 0.17 | - | <LOQ | <LOQ | <LOQ | 0.02 | - | <LOQ | <LOQ | Kallenborn et al., 2013 |
| 2008 | 19.1 | 0.17 | - | <LOQ | <LOQ | <LOQ | <LOQ | - | <LOQ | <LOQ | Kallenborn et al., 2013 |
| 2008 | 20.1 | 0.18 | - | <LOQ | <LOQ | <LOQ | <LOQ | - | <LOQ | <LOQ | Kallenborn et al., 2013 |
| 2008 | 15   | 0.2  | - | <LOQ | <LOQ | 0.03 | 0.02 | - | <LOQ | <LOQ | Kallenborn et al., 2013 |
| 2008 | 19.4 | 0.18 | - | <LOQ | <LOQ | <LOQ | <LOQ | - | <LOQ | <LOQ | Kallenborn et al., 2013 |
| 2008 | 30.9 | 0.35 | - | 0.09 | <LOQ | <LOQ | 0.02 | - | <LOQ | <LOQ | Kallenborn et al., 2013 |
| 2008 | 24.2 | 0.19 | - | <LOQ | <LOQ | <LOQ | 0.02 | - | <LOQ | <LOQ | Kallenborn et al., 2013 |

|      |      |      |   |      |      |      |      |   |      |      |                         |
|------|------|------|---|------|------|------|------|---|------|------|-------------------------|
| 2008 | <LOQ |      | - | <LOQ | <LOQ | <LOQ | <LOQ | - | <LOQ | <LOQ | Kallenborn et al., 2013 |
| 2008 | <LOQ |      | - | <LOQ | <LOQ | <LOQ | <LOQ | - | <LOQ | <LOQ | Kallenborn et al., 2013 |
| 2008 | <LOQ |      | - | <LOQ | <LOQ | <LOQ | <LOQ | - | <LOQ | <LOQ | Kallenborn et al., 2013 |
| 2008 | 17.1 | 0.19 | - | <LOQ | <LOQ | <LOQ | <LOQ | - | <LOQ | <LOQ | Kallenborn et al., 2013 |

Continue

|      |      |      |   |      |      |      |      |   |      |      |                         |
|------|------|------|---|------|------|------|------|---|------|------|-------------------------|
| 2008 | 17.6 | 0.29 | - | <LOQ | <LOQ | <LOQ | <LOQ | - | <LOQ | <LOQ | Kallenborn et al., 2013 |
| 2008 | 16.4 | 0.3  | - | 0.13 | <LOQ | <LOQ | <LOQ | - | <LOQ | <LOQ | Kallenborn et al., 2013 |
| 2009 | 21.4 | 0.18 | - | <LOQ | <LOQ | <LOQ | <LOQ | - | <LOQ | <LOQ | Kallenborn et al., 2013 |
| 2009 | 18.6 | 0.18 | - | <LOQ | <LOQ | <LOQ | <LOQ | - | <LOQ | <LOQ | Kallenborn et al., 2013 |
| 2009 | 19.3 | 0.25 | - | 0.1  | <LOQ | <LOQ | <LOQ | - | <LOQ | <LOQ | Kallenborn et al., 2013 |
| 2009 | 25.2 | 0.22 | - | <LOQ | <LOQ | 0.03 | <LOQ | - | <LOQ | <LOQ | Kallenborn et al., 2013 |
| 2009 | 24.6 | 0.17 | - | <LOQ | <LOQ | <LOQ | <LOQ | - | <LOQ | <LOQ | Kallenborn et al., 2013 |
| 2009 | 22.7 | 0.22 | - | 0.08 | <LOQ | <LOQ | <LOQ | - | <LOQ | <LOQ | Kallenborn et al., 2013 |
| 2009 | 22.1 | 0.23 | - | 0.09 | <LOQ | <LOQ | <LOQ | - | <LOQ | <LOQ | Kallenborn et al., 2013 |
| 2009 | 22.8 | 0.38 | - | 0.45 | 0.08 | <LOQ | 0.22 | - | 0.07 | <LOQ | Kallenborn et al., 2013 |
| 2009 | 24.6 | 0.21 | - | 0.15 | 0.05 | <LOQ | 0.12 | - | 0.05 | <LOQ | Kallenborn et al., 2013 |
| 2009 | 27   | 0.19 | - | <LOQ | <LOQ | <LOQ | <LOQ | - | <LOQ | <LOQ | Kallenborn et al., 2013 |
| 2009 | 25.5 | 0.21 | - | 0.26 | 0.04 | <LOQ | 0.15 | - | 0.05 | <LOQ | Kallenborn et al., 2013 |
| 2009 | 24.8 | 0.36 | - | 0.31 | 0.05 | <LOQ | 0.17 | - | 0.06 | <LOQ | Kallenborn et al., 2013 |
| 2009 | 25.8 | 0.22 | - | 0.17 | 0.03 | <LOQ | 0.1  | - | 0.04 | <LOQ | Kallenborn et al., 2013 |
| 2009 | 28.1 | 0.15 | - | <LOQ | <LOQ | <LOQ | <LOQ | - | <LOQ | <LOQ | Kallenborn et al., 2013 |
| 2009 | 28.8 | 0.24 | - | <LOQ | <LOQ | <LOQ | <LOQ | - | <LOQ | <LOQ | Kallenborn et al., 2013 |
| 2009 | 27   | 0.17 | - | <LOQ | <LOQ | <LOQ | 0.1  | - | 0.1  | <LOQ | Kallenborn et al., 2013 |
| 2009 | 27.8 | 0.17 | - | <LOQ | <LOQ | <LOQ | 0.1  | - | 0.1  | <LOQ | Kallenborn et al., 2013 |

|      |      |      |   |      |      |      |      |   |      |      |                         |
|------|------|------|---|------|------|------|------|---|------|------|-------------------------|
| 2009 | 26.5 | 0.2  | - | <LOQ | <LOQ | <LOQ | <LOQ | - | <LOQ | <LOQ | Kallenborn et al., 2013 |
| 2009 | 23.6 | 0.25 | - | 0.09 | 0.08 | <LOQ | 0.1  | - | 0.14 | <LOQ | Kallenborn et al., 2013 |
| 2009 | 26.2 | 0.24 | - | <LOQ | <LOQ | <LOQ | <LOQ | - | <LOQ | <LOQ | Kallenborn et al., 2013 |
| 2009 | 27.8 | 0.18 | - | <LOQ | <LOQ | <LOQ | <LOQ | - | <LOQ | <LOQ | Kallenborn et al., 2013 |

Continue

|      |       |      |   |      |      |      |      |   |      |      |                         |
|------|-------|------|---|------|------|------|------|---|------|------|-------------------------|
| 2009 | 29.8  | 0.23 | - | <LOQ | 0.05 | <LOQ | 0.1  | - | 0.1  | <LOQ | Kallenborn et al., 2013 |
| 2009 | 21.4  | 0.24 | - | <LOQ | <LOQ | <LOQ | <LOQ | - | <LOQ | <LOQ | Kallenborn et al., 2013 |
| 2009 | 22.8  | 0.17 | - | <LOQ | <LOQ | <LOQ | <LOQ | - | <LOQ | <LOQ | Kallenborn et al., 2013 |
| 2009 | 21    | 0.18 | - | <LOQ | <LOQ | <LOQ | <LOQ | - | <LOQ | <LOQ | Kallenborn et al., 2013 |
| 2009 | 19.8  | 0.19 | - | <LOQ | <LOQ | <LOQ | <LOQ | - | <LOQ | <LOQ | Kallenborn et al., 2013 |
| 2009 | 16.2  | 0.18 | - | <LOQ | <LOQ | <LOQ | <LOQ | - | <LOQ | <LOQ | Kallenborn et al., 2013 |
| 2009 | 22.3  | 0.16 | - | <LOQ | <LOQ | <LOQ | <LOQ | - | <LOQ | <LOQ | Kallenborn et al., 2013 |
| 2009 | 18    | 0.16 | - | <LOQ | <LOQ | <LOQ | <LOQ | - | <LOQ | <LOQ | Kallenborn et al., 2013 |
| 2009 | 15.4  | 0.16 | - | <LOQ | <LOQ | <LOQ | <LOQ | - | <LOQ | <LOQ | Kallenborn et al., 2013 |
| 2009 | 12.3  | 0.17 | - | <LOQ | <LOQ | <LOQ | <LOQ | - | <LOQ | <LOQ | Kallenborn et al., 2013 |
| 2009 | 12.3  | 0.16 | - | <LOQ | <LOQ | <LOQ | <LOQ | - | <LOQ | <LOQ | Kallenborn et al., 2013 |
| 2009 | 14.9  | 0.14 | - | <LOQ | <LOQ | <LOQ | <LOQ | - | <LOQ | <LOQ | Kallenborn et al., 2013 |
| 2009 | 11.6  | 0.17 | - | <LOQ | 0.04 | <LOQ | <LOQ | - | 0.06 | <LOQ | Kallenborn et al., 2013 |
| 2009 | 12.94 | 0.17 | - | <LOQ | 0.02 | 0.04 | <LOQ | - | <LOQ | <LOQ | Kallenborn et al., 2013 |
| 2009 | <LOQ  | 0.15 | - | <LOQ | <LOQ | <LOQ | <LOQ | - | <LOQ | <LOQ | Kallenborn et al., 2013 |
| 2009 | 11.8  | 0.16 | - | <LOQ | <LOQ | <LOQ | <LOQ | - | <LOQ | <LOQ | Kallenborn et al., 2013 |
| 2009 | 15.9  | 0.15 | - | <LOQ | 0.07 | <LOQ | <LOQ | - | 0.09 | <LOQ | Kallenborn et al., 2013 |
| 2009 | 12.7  | 0.17 | - | <LOQ | <LOQ | <LOQ | <LOQ | - | <LOQ | <LOQ | Kallenborn et al., 2013 |
| 2009 | 16    | 0.22 | - | <LOQ | <LOQ | <LOQ | <LOQ | - | <LOQ | <LOQ | Kallenborn et al., 2013 |

|      |       |      |   |      |      |      |      |   |      |      |                         |
|------|-------|------|---|------|------|------|------|---|------|------|-------------------------|
| 2009 | 18.25 | 0.16 | - | <LOQ | <LOQ | <LOQ | <LOQ | - | <LOQ | <LOQ | Kallenborn et al., 2013 |
| 2009 | 21    | 0.16 | - | <LOQ | <LOQ | <LOQ | <LOQ | - | <LOQ | <LOQ | Kallenborn et al., 2013 |
| 2009 | 21.5  | 0.2  | - | <LOQ | <LOQ | <LOQ | <LOQ | - | <LOQ | <LOQ | Kallenborn et al., 2013 |
| 2009 | 19.8  | 0.18 | - | <LOQ | <LOQ | <LOQ | <LOQ | - | <LOQ | <LOQ | Kallenborn et al., 2013 |

Continue

|      |       |      |   |      |      |      |      |   |      |      |                         |
|------|-------|------|---|------|------|------|------|---|------|------|-------------------------|
| 2009 | 20.8  | 0.18 | - | <LOQ | <LOQ | <LOQ | <LOQ | - | <LOQ | <LOQ | Kallenborn et al., 2013 |
| 2009 | 25.5  | 0.17 | - | <LOQ | <LOQ | <LOQ | <LOQ | - | <LOQ | <LOQ | Kallenborn et al., 2013 |
| 2009 | 18.91 | 0.16 | - | <LOQ | <LOQ | <LOQ | <LOQ | - | <LOQ | <LOQ | Kallenborn et al., 2013 |
| 2009 | 25.31 | 0.17 | - | <LOQ | <LOQ | <LOQ | <LOQ | - | <LOQ | <LOQ | Kallenborn et al., 2013 |
| 2009 | 19.8  | 0.18 | - | <LOQ | <LOQ | <LOQ | <LOQ | - | <LOQ | <LOQ | Kallenborn et al., 2013 |
| 2009 | 23.4  | 0.2  | - | <LOQ | <LOQ | <LOQ | <LOQ | - | <LOQ | <LOQ | Kallenborn et al., 2013 |
| 2009 | 20.2  | 0.25 | - | <LOQ | <LOQ | <LOQ | <LOQ | - | <LOQ | <LOQ | Kallenborn et al., 2013 |
| 2009 | 23.5  | 0.25 | - | <LOQ | <LOQ | <LOQ | <LOQ | - | <LOQ | <LOQ | Kallenborn et al., 2013 |
| 2010 | 28.1  | 0.17 | - | <LOQ | <LOQ | <LOQ | <LOQ | - | <LOQ | <LOQ | Kallenborn et al., 2013 |
| 2010 | 25.53 | 0.16 | - | <LOQ | <LOQ | <LOQ | <LOQ | - | <LOQ | <LOQ | Kallenborn et al., 2013 |
| 2010 | 24.69 | 0.17 | - | <LOQ | <LOQ | <LOQ | <LOQ | - | <LOQ | <LOQ | Kallenborn et al., 2013 |
| 2010 | 26.3  | 0.13 | - | <LOQ | <LOQ | <LOQ | <LOQ | - | <LOQ | <LOQ | Kallenborn et al., 2013 |
| 2010 | 27.63 | 0.17 | - | <LOQ | <LOQ | <LOQ | <LOQ | - | <LOQ | <LOQ | Kallenborn et al., 2013 |
| 2010 | 27.35 | 0.16 | - | <LOQ | <LOQ | <LOQ | <LOQ | - | <LOQ | <LOQ | Kallenborn et al., 2013 |
| 2010 | 29.98 | 0.28 | - | <LOQ | <LOQ | <LOQ | <LOQ | - | <LOQ | <LOQ | Kallenborn et al., 2013 |
| 2010 | 27.71 | 0.15 | - | <LOQ | <LOQ | <LOQ | <LOQ | - | <LOQ | <LOQ | Kallenborn et al., 2013 |
| 2010 | 27    | 0.13 | - | <LOQ | <LOQ | <LOQ | <LOQ | - | <LOQ | <LOQ | Kallenborn et al., 2013 |
| 2010 | 18.02 | 0.17 | - | 0.15 | <LOQ | <LOQ | <LOQ | - | <LOQ | <LOQ | Kallenborn et al., 2013 |
| 2010 | <LOQ  | 0.17 | - | <LOQ | <LOQ | <LOQ | <LOQ | - | <LOQ | <LOQ | Kallenborn et al., 2013 |













Table S.2. Reported atmospheric levels for the 7 polychlorinated biphenyls (PCBs) congeners reviewed. ND: Not detected, NR: Not reported, BDL: Below detection limit, LOQ: Limit of quantification

| Year | PCB 28 | PCB 52 | PCB 101 | PCB 118 | PCB 138 | PCB 153 | PCB 180 | Reference                   |
|------|--------|--------|---------|---------|---------|---------|---------|-----------------------------|
| 2009 | 0.576  | 1.775  | -       | 0.082   | 0.281   | 1.359   | 0.187   | Cabrerizo et al., 2013      |
| 2009 | 0.29   | 1.325  | -       | 0.048   | 0.227   | 1.38    | 0.196   | Cabrerizo et al., 2013      |
| 2009 | 0.216  | 0.863  | -       | 0.02    | 0.126   | 1.119   | 0.153   | Cabrerizo et al., 2013      |
| 2009 | 0.238  | 0.672  | -       | 0.048   | 0.174   | 1.175   | 0.185   | Cabrerizo et al., 2013      |
| 2009 | 0.633  | 1.977  | -       | 0.124   | 0.609   | 1.27    | 0.215   | Cabrerizo et al., 2013      |
| 2009 | 0.315  | 0.494  | -       | 0.108   | 0.454   | 1.139   | 0.2     | Cabrerizo et al., 2013      |
| 2009 | 0.781  | 2.133  | -       | 0.405   | 0.881   | 1.211   | 0.188   | Cabrerizo et al., 2013      |
| 2009 | 0.281  | 1.29   | -       | 0.064   | 0.34    | 0.819   | 0.13    | Cabrerizo et al., 2013      |
| 2009 | 0.6    | 1.296  | -       | 0.339   | 0.581   | 1.107   | 0.221   | Cabrerizo et al., 2013      |
| 2009 | 0.133  | 0.88   |         | 0.022   | 0.144   | 0.854   | 0.144   | Cabrerizo et al., 2013      |
| 2009 | 0.186  | 0.505  | -       | 0.034   | 0.212   | 0.729   | 0.143   | Cabrerizo et al., 2013      |
| 2009 | 0.224  | 0.534  | -       | 0.02    | 0.159   | 0.718   | 0.108   | Cabrerizo et al., 2013      |
| 2009 | 0.259  | 0.691  | -       | 0.058   | 0.359   | 0.783   | 0.142   | Cabrerizo et al., 2013      |
| 2009 | 0.144  |        | -       | 0.035   | 0.231   | 0.565   | 0.108   | Cabrerizo et al., 2013      |
| 2009 | 0.247  | 3.86   | -       | 0.036   | 0.262   | 0.628   | 0.129   | Cabrerizo et al., 2013      |
| 2005 | 1.41   | 4.84   | -       | 0.68    | 0.88    | 1.02    | 0.51    | Galbán-Malagón et al., 2013 |
| 2005 | 1.07   | 5.01   | -       | 1.97    | 1.91    | 2.38    | 0.35    | Galbán-Malagón et al., 2013 |
| 2005 | 2.62   | 3.73   | -       | 0.51    | 2.59    | 2.8     | 0.18    | Galbán-Malagón et al., 2013 |
| 2005 | 2.02   | 1.53   | -       | 0.62    | 0.94    | 1.06    | 0.13    | Galbán-Malagón et al., 2013 |
| 2005 | 0.88   |        | -       | 0.57    | 0.59    | 0.71    | 0.52    | Galbán-Malagón et al., 2013 |
| 2005 | 0.53   | 2.38   | -       | 0.25    | 0.42    | 0.49    | 0.2     | Galbán-Malagón et al., 2013 |
| 2005 | 2.59   | 5.1    | -       | 1.39    | 1.92    | 2.28    | 0.3     | Galbán-Malagón et al., 2013 |
| 2005 | 0.6    | 5.35   | -       | 0.38    | 0.65    | 0.69    | 0.34    | Galbán-Malagón et al., 2013 |
| 2005 | 1.56   | 6.1    | -       | 0.51    | 1.01    | 0.93    | 0.17    | Galbán-Malagón et al., 2013 |
| 2005 | 2.71   | 0.56   | -       | 0.79    | 1.1     | 1.08    | NR      | Galbán-Malagón et al., 2013 |
| 2005 | 1.82   | 0.09   | -       | 0.58    | 0.56    | 0.56    | NR      | Galbán-Malagón et al., 2013 |
| 2008 | 3.89   | 0.09   | -       | 2.27    | 4.39    | 2.87    | 1.9     | Galbán-Malagón et al., 2013 |
| 2008 | 5.11   | 1.77   | -       | 4.07    | 2.75    | 2.68    | 0.03    | Galbán-Malagón et al., 2013 |

|      |      |      |   |      |      |      |      |                             |
|------|------|------|---|------|------|------|------|-----------------------------|
| 2008 | 0.39 | 4.56 | - | 0.59 | 0.17 | 0.22 | 0.12 | Galbán-Malagón et al., 2013 |
|------|------|------|---|------|------|------|------|-----------------------------|

Continue

|           |                   |                   |                   |                   |                   |                   |                   |                             |
|-----------|-------------------|-------------------|-------------------|-------------------|-------------------|-------------------|-------------------|-----------------------------|
| 2008      | 0.58              | 1.29              | -                 | 0.26              | 0.37              | 0.48              | 0.75              | Galbán-Malagón et al., 2013 |
| 2008      | 12.96             | 0.78              | -                 | 1.8               | 1.94              | 1.75              | 1.41              | Galbán-Malagón et al., 2013 |
| 2008      | 2.93              | 2.92              | -                 | 0.89              | 2.17              | 11.21             | 0.39              | Galbán-Malagón et al., 2013 |
| 2009      | 1.05              | 0.29              | -                 | 0.43              | 1.22              | 1.55              | 0.13              | Galbán-Malagón et al., 2013 |
| 2009      | 1.97              | 0.1               | -                 | 0.14              | 0.53              | 0.71              | 0.89              | Galbán-Malagón et al., 2013 |
| 2009      | 5.1               | 1.15              | -                 | 1.19              | 2.01              | 2.57              | 0.26              | Galbán-Malagón et al., 2013 |
| 2009      | 2                 | 0.36              | -                 | 0.33              | 0.74              | 0.91              | 0.18              | Galbán-Malagón et al., 2013 |
| 2009      | 1.18              | 0.23              | -                 | 0.38              | 0.21              | 0.55              | 0.23              | Galbán-Malagón et al., 2013 |
| 2009      | 1.5               | 0.43              | -                 | 1                 | 0.72              | 0.71              | 0.27              | Galbán-Malagón et al., 2013 |
| 2009      | 3.14              | 1.3               | -                 | 0.33              | 0.7               | 0.75              | 0.32              | Galbán-Malagón et al., 2013 |
| 2009      | 1.58              | 0.6               | -                 | 0.15              | 0.41              | 0.87              | 0.17              | Galbán-Malagón et al., 2013 |
| 2009      | 0.89              | NR                | -                 | 0.17              | 0.23              | 0.45              | 0.04              | Galbán-Malagón et al., 2013 |
| 2009      | 0.16              | NR                | -                 | 0.02              | 0.05              | 0.12              | 0.01              | Galbán-Malagón et al., 2013 |
| 2009      | 0.21              | NR                | -                 | 0.02              | 0.01              | 0.07              | 0.02              | Galbán-Malagón et al., 2013 |
| 2009      | 0.2               | NR                | -                 | 0.02              | 0.02              | 0.08              | NR                | Galbán-Malagón et al., 2013 |
| 2003-2004 | -                 | -                 | -                 | 2                 |                   | -                 | -                 | Gambaro et al., 2005        |
| 2010-2011 | 4.7               | 1.1               | 0.3               | 0.14              | 0.3               | 0.5               | 0.1               | Hao et al. 2019             |
| 2011-2012 | 2.3               | 0.5               | 0.3               | 0.17              | 0.2               | 0.3               | 0.07              | Hao et al. 2019             |
| 2012-2013 | 4.4               | 0.69              | 0.3               | 0.2               | 0.16              | 0.21              | 0.05              | Hao et al. 2019             |
| 2013-2014 | 3.3               | 0.4               | 0.3               | 0.13              | 0.12              | 0.14              | 0.03              | Hao et al. 2019             |
| 2014-2015 | 1.3               | 0.3               | 0.3               | 0.14              | 0.2               | 0.2               | 0.05              | Hao et al. 2019             |
| 2015-2017 | 0.7               | 0.15              | 0.07              | 0.03              | 0.04              | 0.06              | 0.02              | Hao et al. 2019             |
| 2017-2018 | 0.5               | 0.11              | 0.06              | 0.02              | 0.03              | 0.05              | 0.01              | Hao et al. 2019             |
| 1994      | 3.9               | 1.1               | 0.53 <sup>x</sup> | 0.53              | 0.51 <sup>x</sup> | 0.45 <sup>x</sup> | 0.17 <sup>x</sup> | Kallenborn et al., 1998     |
| 1994      | 0.84 <sup>x</sup> | 0.31 <sup>x</sup> | 0.26 <sup>x</sup> | 0.32 <sup>x</sup> | 0.24 <sup>x</sup> | 0.30 <sup>x</sup> | 0.12 <sup>x</sup> | Kallenborn et al., 1998     |
| 1994      | 1.0 <sup>x</sup>  | 0.44 <sup>x</sup> | 0.27 <sup>x</sup> | 0.39 <sup>x</sup> | 0.34 <sup>x</sup> | 0.48              | 0.18 <sup>x</sup> | Kallenborn et al., 1998     |
| 1994      | 1.8 <sup>x</sup>  | 0.98 <sup>x</sup> | 0.59 <sup>x</sup> | 1.1               | 1.4               | 2.7               | 1.11              | Kallenborn et al., 1998     |
| 1994      | 2.8 <sup>x</sup>  | 0.93 <sup>x</sup> | 0.29 <sup>x</sup> | 0.23 <sup>x</sup> | 0.22 <sup>x</sup> | <0.2              | 0.09 <sup>x</sup> | Kallenborn et al., 1998     |
| 1994      | <0.8              | 0.12 <sup>x</sup> | 0.06 <sup>x</sup> | 0.07 <sup>x</sup> | 0.06 <sup>x</sup> | <0.2              | 0.03 <sup>x</sup> | Kallenborn et al., 1998     |

|      |                  |                   |                   |                   |      |      |                   |                         |
|------|------------------|-------------------|-------------------|-------------------|------|------|-------------------|-------------------------|
| 1995 | 1.2 <sup>x</sup> | 0.46 <sup>x</sup> | 0.13 <sup>x</sup> | 0.16 <sup>x</sup> | <0.1 | <0.2 | 0.09 <sup>x</sup> | Kallenborn et al., 1998 |
|------|------------------|-------------------|-------------------|-------------------|------|------|-------------------|-------------------------|

Continue

|      |      |      |      |                   |                   |                   |                   |                         |
|------|------|------|------|-------------------|-------------------|-------------------|-------------------|-------------------------|
| 1995 | 16   | 9.5  | 3.9  | 0.6               | 0.57              | 0.94              | 0.13 <sup>x</sup> | Kallenborn et al., 1998 |
| 1995 | 25   | 13   | 4.5  | 0.95              | 0.83              | 1.2               | 0.2               | Kallenborn et al., 1998 |
| 1995 | 15   | 12   | 5    | 0.79              | 0.63              | 1.1               | 0.06 <sup>x</sup> | Kallenborn et al., 1998 |
| 1995 | 22   | 12   | 4.5  | 0.85              | 0.77              | 1.3               | 0.22              | Kallenborn et al., 1998 |
| 1995 | 16   | 8.8  | 3.4  | 0.68              | 0.71              | 0.98              | 0.18 <sup>x</sup> | Kallenborn et al., 1998 |
| 1995 | 21   | 13   | 4.8  | 0.79              | 0.79              | 1.4               | 0.22              | Kallenborn et al., 1998 |
| 1995 | 24   | 15   | 5.7  | 0.95              | 1.1               | 1.6               | 0.29              | Kallenborn et al., 1998 |
| 1995 | 9.4  | 6    | 2.3  | 0.33 <sup>x</sup> | 0.27              | 0.53              | 0.09 <sup>x</sup> | Kallenborn et al., 1998 |
| 1995 | <0.8 | <0.4 | 3.6  | 0.61              | 1.1               | 1.1               | 0.24              | Kallenborn et al., 1998 |
| 1995 | 4.7  | 1.1  | 0.26 | 0.12 <sup>x</sup> | <0.1              | <0.2              | 0.02 <sup>x</sup> | Kallenborn et al., 1998 |
| 1995 | 16   | 9.5  | 3.9  | 0.6               | 0.57              | 0.94              | 0.13 <sup>x</sup> | Kallenborn et al., 1998 |
| 1995 | 13   | 7.5  | 2.9  | 0.49              | 0.45 <sup>x</sup> | 0.73              | 0.11 <sup>x</sup> | Kallenborn et al., 1998 |
| 1995 | 14   | 8.4  | 3.4  | 0.54              | 0.52 <sup>x</sup> | 0.84              | 3.4               | Kallenborn et al., 1998 |
| 1995 | 7.4  | 4.6  | 1.7  | 0.27 <sup>x</sup> | 0.28 <sup>x</sup> | 0.43 <sup>x</sup> | 0.06 <sup>x</sup> | Kallenborn et al., 1998 |
| 2008 | 0.25 | -    | <LOQ | -                 | -                 | -                 | -                 | Kallenborn et al., 2013 |
| 2008 | 0.16 | -    | <LOQ | -                 | -                 | -                 | -                 | Kallenborn et al., 2013 |
| 2009 | 0.13 | -    | 0.1  | -                 | -                 | -                 | -                 | Kallenborn et al., 2013 |
| 2009 | 0.21 | -    | 0.07 | -                 | -                 | -                 | -                 | Kallenborn et al., 2013 |
| 2010 | 0.18 | -    | 0.07 | -                 | -                 | -                 | -                 | Kallenborn et al., 2013 |
| 2010 | 0.45 | -    | 0.24 | -                 | -                 | -                 | -                 | Kallenborn et al., 2013 |
| 2010 | 0.15 | -    | 0.09 | -                 | -                 | -                 | -                 | Kallenborn et al., 2013 |
| 1988 | -    | -    | 4    | -                 | 2                 | 4                 | -                 | Larson et al., 1999     |
| 1988 | -    | -    | ND   | -                 | 1                 | 1                 | -                 | Larson et al., 1999     |
| 1988 | -    | -    | 1    | -                 | 1                 | 1                 | -                 | Larson et al., 1999     |
| 1988 | -    | -    | 14   | -                 | 14                | 10                | -                 | Larson et al., 1999     |
| 1988 | -    | -    | ND   | -                 | 1                 | 0.5               | -                 | Larson et al., 1999     |
| 1988 | -    | -    | 1    | -                 | 0.3               | 0.3               | -                 | Larson et al., 1999     |
| 1988 | -    | -    | 4    | -                 | 1                 | 1                 | -                 | Larson et al., 1999     |
| 1988 | -    | -    | 2    | -                 | 1                 | 1                 | -                 | Larson et al., 1999     |

|      |   |   |    |   |   |   |   |                     |
|------|---|---|----|---|---|---|---|---------------------|
| 1988 | - | - | ND | - | 1 | 1 | - | Larson et al., 1999 |
|------|---|---|----|---|---|---|---|---------------------|

Continue

|           |      |       |       |       |       |       |       |                     |
|-----------|------|-------|-------|-------|-------|-------|-------|---------------------|
| 1988      |      | -     | 1     | -     | 0.4   | 0.3   | -     | Larson et al., 1999 |
| 1988      | -    | -     | ND    | -     | 13    | 10    | -     | Larson et al., 1999 |
| 1988      | -    | -     | 444   | -     | 1810  | 1280  | -     | Larson et al., 1999 |
| 1988      | -    | -     | 2     | -     | 9     | 1     | -     | Larson et al., 1999 |
| 1989      | -    | -     | 2     | -     | 2     | 1     | -     | Larson et al., 1999 |
| 1989      | -    | -     | 3     | -     | 1     | 1     | -     | Larson et al., 1999 |
| 1989      | -    | -     | ND    | -     | ND    | ND    | -     | Larson et al., 1999 |
| 1989      | -    |       | 7     |       | 5     | 15    |       | Larson et al., 1999 |
| 1989      | -    | -     | 1     | -     | 1     | 1     | -     | Larson et al., 1999 |
| 1989      | -    | -     | 7     | -     | 2     | 2     | -     | Larson et al., 1999 |
| 1989      | -    | -     | ND    | -     | 1     | 1     | -     | Larson et al., 1999 |
| 1989      | -    | -     | 4     | -     | 1     | 1     | -     | Larson et al., 1999 |
| 1989      | -    | -     | 1     | -     | ND    | 0     | -     | Larson et al., 1999 |
| 1989      | -    | -     | ND    | -     | ND    | ND    | -     | Larson et al., 1999 |
| 1989      |      | -     | 2     | -     | 1     | 0     | -     | Larson et al., 1999 |
| 1989      | -    | -     | ND    | -     | 1     | 1     | -     | Larson et al., 1999 |
| 1989      | -    | -     | 3     | -     | 2     | 2     | -     | Larson et al., 1999 |
| 1989      | -    | -     | 0.5   | -     | 0.2   | 0.3   | -     | Larson et al., 1999 |
| 1989      | -    | -     | 1     | -     | 0.3   | 0.4   | -     | Larson et al., 1999 |
| 1990      | -    | -     | 1     | -     | 1     | 1     | -     | Larson et al., 1999 |
| 2009-2010 | 3.46 | 0.67  | 0.1   | 0.197 | 0.18  | 0.26  | 0.039 | Li et al. 2012      |
| 2009-2010 | 5.53 | 0.62  | 0.05  | 0.07  | 0.05  | 0.07  | 0.009 | Li et al. 2012      |
| 2009-2010 | 1.7  | 0.24  | 0.16  | 0.042 | 0.03  | 0.04  | 0.006 | Li et al. 2012      |
| 2009-2010 | 5.1  | 0.78  | 0.05  | 0.148 | 0.11  | 0.17  | 0.029 | Li et al. 2012      |
| 2009-2010 | 1.17 | 0.2   | 0.19  | 0.064 | 0.06  | 0.1   | 0.019 | Li et al. 2012      |
| 2009-2010 | 0.57 | 0.068 | 0.086 | 0.034 | 0.032 | 0.028 | 0.01  | Li et al. 2012b     |
| 2009-2010 | 1.08 | 0.056 | 0.14  | 0.026 | 0.048 | 0.04  | 0.008 | Li et al. 2012b     |
| 2009-2010 | 1.1  | 0.13  | 0.32  | 0.024 | 0.03  | 0.032 | 0.01  | Li et al. 2012b     |

|           |      |      |       |       |       |      |       |                      |
|-----------|------|------|-------|-------|-------|------|-------|----------------------|
| 2009-2010 | 0.28 | 0.21 | 0.084 | 0.036 | 0.036 | 0.04 | 0.012 | Li et al. 2012b      |
| 1993      | -    | 8    | 6.8   | 5.9   | 3.8   | 7.3  | <0.64 | Montone et al., 2001 |

Continue

|      |      |       |       |       |       |       |       |                      |
|------|------|-------|-------|-------|-------|-------|-------|----------------------|
| 1993 | -    | 4.7   | <4.00 | 2.4   | <2.30 | 3.7   | <0.64 | Montone et al., 2001 |
| 1993 | -    | 7.8   | <4.00 | 3.6   | <2.30 | 4.7   | <0.64 | Montone et al., 2001 |
| 1994 | -    | <4.57 | <4.00 | 6.1   | 3.4   | 4.8   | <0.64 | Montone et al., 2001 |
| 1994 | -    | <4.57 | <4.00 | <2.40 | <2.30 | <3.56 | <0.64 | Montone et al., 2001 |
| 1994 | -    | <4.57 | <4.00 | <2.40 | <2.30 | <3.56 | <0.64 | Montone et al., 2001 |
| 1994 | -    | <4.57 | <4.00 | <2.40 | <2.30 | <3.56 | <0.64 | Montone et al., 2001 |
| 1994 | -    | <4.57 | <4.00 | <2.40 | <2.30 | <3.56 | <0.64 | Montone et al., 2001 |
| 1995 | -    | 7.3   | 5.2   | 4.9   | 2.7   | 3.8   | <0.6  | Montone et al., 2003 |
| 1995 | -    | 8.7   | 7.2   | 17    | 10.4  | 18.5  | <0.6  | Montone et al., 2003 |
| 1995 | -    | 2.3   | 4     | 4.4   | 2.5   | <3.6  | <0.6  | Montone et al., 2003 |
| 1996 | -    | 19.1  | 12    | 8.5   | 5.2   | 4.1   | <0.6  | Montone et al., 2003 |
| 1996 | -    | 33.2  | 10.7  | 8.7   | 4.3   | 6.4   | <0.6  | Montone et al., 2003 |
| 1996 | -    | 6.6   | <4    | <2.4  | -2.3  | <3.6  | <0.6  | Montone et al., 2003 |
| 1996 | -    | -4.6  | <4    | <2.4  | -2.3  | <3.6  | <0.6  | Montone et al., 2003 |
| 1996 | -    | -4.6  | <4    | <2.4  | -2.3  | <3.6  | <0.6  | Montone et al., 2003 |
| 1996 | -    | 10.5  | 5.4   | 4.5   | -2.3  | <3.6  | <0.6  | Montone et al., 2003 |
| 1996 | -    | 9     | 9.5   | 11.5  | 4.6   | 8.2   | <0.6  | Montone et al., 2003 |
| 1996 | -    | 17    | 8.2   | 6.7   | -2.3  | 4.5   | <0.6  | Montone et al., 2003 |
| 1996 | -    | -4.6  | <4    | <2.4  | -2.3  | <3.6  | <0.6  | Montone et al., 2003 |
| 1996 | -    | -4.6  | <4    | <2.4  | -2.3  | <3.6  | <0.6  | Montone et al., 2003 |
| 1996 | -    | -4.6  | <4    | <2.4  | -2.3  | <3.6  | <0.6  | Montone et al., 2003 |
| 1996 | -    | -4.6  | <4    | <2.4  | -2.3  | <3.6  | <0.6  | Montone et al., 2003 |
| 1996 | -    | 6.8   | <4    | <2.4  | -2.3  | <3.6  | <0.6  | Montone et al., 2003 |
| 1996 | -    | 5.7   | <4    | <2.4  | -2.3  | <3.6  | <0.6  | Montone et al., 2003 |
| 1996 | -    | 8.6   | 150.8 | 207.8 |       | <3.6  | <0.6  | Montone et al., 2003 |
| 1995 | 14.9 | 6.9   | 4.6   | <2.4  | 3     | <3.6  | <0.6  | Montone et al., 2005 |
| 1995 | 14.7 | 9.6   | 9.3   | 6     | 4     | 7.1   | <0.6  | Montone et al., 2005 |
| 1995 | 23.8 | 11.4  | 7     | 2.8   | 2.3   | 4.1   | <0.6  | Montone et al., 2005 |
| 1995 | 9.3  | 9.3   | 6     | 2.9   | 2.6   | 3.9   | <0.6  | Montone et al., 2005 |





|      |    |    |    |    |    |    |    |                |
|------|----|----|----|----|----|----|----|----------------|
| 2014 | ND | Wu et al. 2020 |
| 2014 | ND | Wu et al. 2020 |

Continue

|      |    |    |      |      |     |       |       |                |
|------|----|----|------|------|-----|-------|-------|----------------|
| 2014 | ND | ND | 0.12 | ND   | ND  | 0.094 | ND    | Wu et al. 2020 |
| 2014 | ND | ND | ND   | ND   | ND  | ND    | ND    | Wu et al. 2020 |
| 2014 | ND | ND | 0.12 | 0.34 | 0.2 | 0.3   | 0.27  | Wu et al. 2020 |
| 2014 | ND | ND | ND   | 0.14 | ND  | 0.14  | 0.083 | Wu et al. 2020 |
| 2014 | ND | ND | ND   | ND   | ND  | 0.1   | ND    | Wu et al. 2020 |
| 2014 | ND | ND | ND   | ND   | ND  | 0.097 | ND    | Wu et al. 2020 |

Table S.3. Physical-chemical properties of POPs reported in the Antarctic atmosphere. Data shown are the molecular weight (MW), Henry's law constant (H), octanol-water partition coefficient (log K<sub>OW</sub>), octanol-air partition coefficient (log K<sub>OA</sub>) and estimated atmospheric decrementing times (T<sub>D</sub>) and half-lives reported by other studies.

| Compound | MW<br>(g mol <sup>-1</sup> ) | H<br>(Pa m <sup>3</sup> mol <sup>-1</sup> at<br>25°C) | log K <sub>OW</sub> | log K <sub>OA</sub> | T <sub>D</sub><br>(Years) | Half-life<br>(Years)                           |
|----------|------------------------------|-------------------------------------------------------|---------------------|---------------------|---------------------------|------------------------------------------------|
| HCB      | 285                          | 53 <sup>a</sup>                                       | 5.7 <sup>a</sup>    | 7.2 <sup>a</sup>    | 12.3                      | 0.4 - 4.3 <sup>k</sup>                         |
| α-hch    | 291                          | 0.74 <sup>b</sup>                                     | 3.8 <sup>d</sup>    | 7.5 <sup>b</sup>    | 14.3                      | 0.06 <sup>k</sup>                              |
| γ-hch    | 291                          | 0.31 <sup>b</sup>                                     | 3.6 <sup>e</sup>    | 3.8 <sup>b</sup>    | 10.1                      | 0.006 <sup>m</sup> - 0.019 <sup>k</sup>        |
| 2,4 DDE  | 319                          | 4.2                                                   | 5.43 <sup>g</sup>   | 9.7                 | 17.6                      | 0.002 <sup>n</sup>                             |
| 4,4-DDE  | 319                          | 4.2 <sup>a</sup>                                      | 6.96 <sup>d</sup>   | 9.7 <sup>a</sup>    | 13.47                     | 0.002 <sup>n</sup>                             |
| 4,4 DDD  | 321                          | 0.5 <sup>a</sup>                                      | 6.22 <sup>d</sup>   | 10a                 | 12.76                     | 0.002-0.02 <sup>m</sup>                        |
| 2,4 DDT  | 354                          | 1.1                                                   | 8.3 <sup>h</sup>    | 9.6 <sup>j</sup>    | 14.4                      | 0.002-0.02 <sup>m</sup>                        |
| 4,4 DDT  | 354                          | 1.1 <sup>a</sup>                                      | 6.39 <sup>i</sup>   | 9.8 <sup>a</sup>    | 17.2                      | 0.002-0.02 <sup>m</sup>                        |
| PCB 28   | 257                          | 37 <sup>c</sup>                                       | 5.7 <sup>f</sup>    | 7.9 <sup>c</sup>    | 3.9                       | 0.038 - 0.08 <sup>k</sup> ; 0.008 <sup>l</sup> |
| PCB 52   | 292                          | 31 <sup>c</sup>                                       | 5.9 <sup>f</sup>    | 8.2 <sup>c</sup>    | 3.7                       | 0.06-0.16 <sup>k</sup> ; 0.17 <sup>l</sup>     |
| PCB 101  | 326                          | 43 <sup>c</sup>                                       | 6.3 <sup>f</sup>    | 8.2 <sup>c</sup>    | 4.7                       | 0.16-0.32 <sup>k</sup> ; 0.34 <sup>l</sup>     |
| PCB 118  | 326                          | 37 <sup>c</sup>                                       | 6.7 <sup>f</sup>    | 9.4 <sup>c</sup>    | 3.6                       | 0.16-0.32 <sup>k</sup> ; 0.34 <sup>l</sup>     |
| PCB 138  | 361                          | 45 <sup>c</sup>                                       | 7 <sup>f</sup>      | 9.7 <sup>c</sup>    | 6.5                       | 0.07-0.2 <sup>k</sup> ; 0.68 <sup>l</sup>      |
| PCB 153  | 361                          | 50 <sup>c</sup>                                       | 6.9 <sup>f</sup>    | 10.4 <sup>c</sup>   | 7.6                       | 0.07-0.2 <sup>k</sup> ; 0.68 <sup>l</sup>      |
| PCB 180  | 395                          | 37 <sup>c</sup>                                       | 7.2 <sup>f</sup>    | 10.2 <sup>c</sup>   | 4.6                       | 1.36 <sup>k</sup>                              |

**References:** <sup>a</sup>Shen and Wania (2005); <sup>b</sup>Xiao et al. (2004); <sup>c</sup>Bamford et al. (2002); <sup>d</sup>Hansch et al. (1995); <sup>e</sup>Sangster (1993); <sup>f</sup>Li et al. (2003); <sup>g</sup>Finzio (1993); <sup>h</sup>Chen et al. (1993); <sup>i</sup>Xiao et al. (2004); <sup>j</sup>Shoeib & Harner (2002); <sup>k</sup>Atkinson (1987); <sup>l</sup>Sinkonen & Parsivita (2000); <sup>m</sup>Howard (1991); <sup>n</sup>Kelly et al. (1994)

Table S.4. Results of U-Mann Whitney test performed to evaluate differences in POPs levels between East and West Antarctica.

| Compound      | p-value  |
|---------------|----------|
| $\alpha$ -HCH | 2.20E-14 |
| $\gamma$ -HCH | 0.4      |
| HCB           | 2.80E-06 |
| 2,4'-DDT      | 0.01085  |
| 4,4'-DDT      | 3.06E-06 |
| PCB-28        | 0.00003  |
| PCB-52        | 0.00007  |
| PCB-101       | 0.5      |
| PCB-118       | 0.06     |
| PCB-138       | 0.01     |
| PCB-153       | 0.8      |
| PCB-180       | 0.8      |

## References

- Amford, H. A., Poster, D. L., Huie, R. E., Baker, J. E.: (2002). Using extra thermodynamic relationships to model the temperature dependence of Henry's law constants of 209 PCB congeners. *Environ. Sci Environ. Sci. Technol.*, *Technol.* 36, 4395–4402. doi: 10.1021/es020599y, 2002..
- Ben, F., Holten-Andersen, J., & Tyle, H.: (1993). New developments of the UNIFAC model for environmental application. *Chemosphere*, 26(7), 1325-1354.
- Bonizio, A., Guardo, A. D., & Vigh, M. (1994). Improved RP-HPLC determination of  $K_{ow}$  for some chloroaromatic chemicals using molecular connectivity indices. *SAR and QSAR in Environmental Research*, 2(4), 249-260.
- Brensch, C., Leo, A., Hoekman, D. (1995). Exploring QSAR: Hydrophobic, electronic, and steric constants. ACS Professional Reference Book. ACS, Washington. 348 pp.
- Chen, N., Wania, F., Lei, Y.D., Daly, G.L. (2003). A comprehensive and critical compilation, evaluation, and selection of physical–chemical property data for selected polychlorinated biphenyls. *J. Phys. Chem. Ref. Data* 32, 1545-1590.
- Conner, J. (1993). LOGKOW – a Databank of Evaluated Octanol-Water Partition Coefficients, Sangster Research Laboratories, Montreal.
- DeGroot, M., & Harner, T. (2002). Using measured octanol-air partition coefficients to explain environmental partitioning of organochlorine pesticides. *Environmental Toxicology and Chemistry: An International Journal*, 21(5), 984-990.
- DeGroot, L., Wania, F. (2005). Compilation, evaluation, and selection of physical-chemical property data for organochlorine pesticides. *J. Chem. Eng. Data* 50, 742–768.
- DeGroot, H., Li, N., Wania, F. (2004). Compilation, evaluation, and selection of physical-chemical property data for  $\alpha$ -,  $\beta$ -, and  $\gamma$ -hexachlorocyclohexane. *J. Chem. Eng. Data* 49, 173–185.
